# Supplementary material
Source: HighWire-hosted journal article supplement (doi:10.1101/rna.053637.115)
Supplement: SuppMaterial.docx [file SuppMaterial.docx]

## SUPPLEMENTARY INFORMATION

## Properties of short double-stranded RNAs carrying randomized base-pairs: towards better controls for RNAi experiments

Julian A. Zagalak1, Mirjam Menzi1, Fabian Schmich2, Hartmut Jahns1, Afzal M. Dogar1, Florian Wullschleger1, Harry Towbin1 and Jonathan Hall1

1Institute of Pharmaceutical Sciences, Department of Chemistry and Applied Biosciences, ETH Zurich, Vladimir-Prelog-Weg 4, CH-8093 Zurich, Switzerland

2Computational Biology Group (CBG), Department of Biosystems Science and Engineering, ETH Zurich, Mattenstrasse 26, CH-4058 Basel, Switzerland

### Supplementary Figures

| **a)** |  |
| --- | --- |
| **b)** |  |
| **c)** |  |

**Supplementary Figure 1** UV-melting profiles as crude hyperchromicity plots. a) Thermal stabilities of siRNDs 1-6. Conditions: 2 µM duplex concentration in phosphate-buffered saline (2.5 mM Na2HPO4, 5mM NaH2PO4, 100 mM NaCl, 0.5 mM EDTA, pH 7), 0.1 K/min. b) Thermal stabilities of siRNA3 with varying number of GC base pairs. Conditions: 2 µM duplex concentration in phosphate-buffered saline (2.5 mM Na2HPO4, 5mM NaH2PO4, 100 mM NaCl, 0.5 mM EDTA, pH 7), 0.1 K/min. c) Thermal stabilities of siRNA3 containing varying numbers of mismatches. Conditions: 2 µM duplex concentration in phosphate-buffered saline (2.5 mM Na2HPO4, 5mM NaH2PO4, 100 mM NaCl, 0.5 mM EDTA, pH 7), 0.5 K/min.

### Supplementary Tables

#### Table 1: siRNA strands and randomized positions

| RNA name | Sequence (5’-3’) | Number of randomized positions / n | Number of possible sequences / n | Unique strand concentration in 50 nM total siRNA concentration |
| --- | --- | --- | --- | --- |
| siRND1_S  siRND1_AS | CGU**X**AU**X**AAG**XX**AACUUAC-dTdT  GUAAGUU**XX**CUU**X**AU**X**ACG-dTdT | 4  4 | 256 | 195 pM |
| siRND2_S  siRND2_AS | GUG**XX**UAA**XX**AAC**X**CA**X**AC-dTdT  GU**X**UG**X**GUU**XX**UUA**XX**CAC-dTdT | 6  6 | 4096 | 12.2 pM |
| siRND3_S  siRND3_AS | G**X**C**XX**AUU**XX**UAU**XX**ACC**X**-dTdT  **X**GGU**XX**AUA**XX**AAU**XX**G**X**C-dTdT | 8  8 | 65536 | 0.76 pM |
| siRND4_S  siRND4_AS | CGC**X**AU**X**AAU**XX**AAUCUAC-dTdT  GUAGAUU**XX**AUU**X**AU**X**GCG-dTdT | 4  4 | 256 | 195 pM |
| siRND5_S  siRND5_AS | GCUA**X**U**X**GAA**XX**AACUUAC-dTdT  GUAAGUU**XX**UUC**X**A**X**UAGC-dTdT | 4  4 | 256 | 195 pM |
| siRND6_S  siRND6_AS | G**X**C**XX**AU**X**U**X**UAU**XX**AC**X**C-dTdT  G**X**GU**XX**AUA**X**A**X**AU**XX**G**X**C-dTdT | 8  8 | 65536 | 0.76 pM |
| siRNA1_AS | GUAAGUU**GU**CUU**G**AU**U**ACG-dTdT | 0 | 1 | 50 nM |
| siRNA2_AS | GU**G**UG**U**GUU**GU**UUA**UG**CAC-dTdT | 0 | 1 | 50 nM |
| siRNA3_AS | **U**GGU**UG**AUA**GG**AAU**GU**G**U**C-dTdT | 0 | 1 | 50 nM |
| siRNA4_AS | GUAGAUU**GU**AUU**G**AU**U**GCG-dTdT | 0 | 1 | 50 nM |
| siRNA5_AS | GUAAGUU**GG**UUC**U**A**U**UAGC-dTdT | 0 | 1 | 50 nM |
| siRNA6_AS | G**U**GU**GG**AUA**U**A**G**AU**GU**G**U**C-dTdT | 0 | 1 | 50 nM |
| siRNA3_S | GACACAUUCCUAUCAACCA-dTdT | 0 | 1 | 50 nM |
| siRNA3-2MM_S | GACACAUU**AA**UAUCAACCA-dTdT | 0 | 1 | 50 nM |
| siRNA3-4MM_S | GACA**A**AUU**AA**UAU**A**AACCA-dTdT | 0 | 1 | 50 nM |
| siRNA3-6MM_S | GAC**CA**AUU**AA**UAU**AC**ACCA-dTdT | 0 | 1 | 50 nM |
| siRNA3-7GC_AS | GACGCAUUGCUAUGCACCG-dTdT | 0 | 1 | 50 nM |
| siRNA3-7GC_S | CGGUGCAUAGCAAUGCGUC-dTdT | 0 | 1 | 50 nM |
| siRNA3-5GC_AS | GACUAAUUGCUAUGCACCG-dTdT | 0 | 1 | 50 nM |
| siRNA3-5GC_S | CGGUGCAUAGCAAUUAGUC-dTdT | 0 | 1 | 50 nM |
| siRNA3-3GC_AS | GACUAAUUUAUAUGCACCG-dTdT | 0 | 1 | 50 nM |
| siRNA3-3GC_S | CGGUGCAUAUAAAUUAGUC-dTdT | 0 | 1 | 50 nM |

#### Table 2: DNA oligonucleotides used for cloning of reporter constructs

| Name | Sequence (5’→3’) |
| --- | --- |
| TS1-3_S | CGctcgagAGCTACGTAATCAAGACAACTTACGTGCATAAACAACACACACGACACATTCCTATCAACCAGTCCTgcggccgcTG |
| TS4-6_S | CGctcgagAGCTACGCAATCAATACAATCTACGCTAATAGAACCAACTTACGACACATCTATATCCACACGTCCTgcggccgcTG |

#### Table 3: SiRNA strand property scores

| siRNA duplex | Randomizations | Total score | Bias AS/SS |
| --- | --- | --- | --- |
| siRND1 | 4 | 10 | 1.2 |
| siRND2 | 6 | 9.25 | 1.1 |
| siRND3 | 8 | 8.25 | 1.2 |
| siRND4 | 4 | 11 | 1.4 |
| siRND5 | 4 | 10 | 1.1 |
| siRND6 | 8 | 7 | 1.0 |
| AS/RND1 | 0 | 9 | 1.1 |
| AS/RND2 | 0 | 8 | 1.2 |
| AS/RND3 | 0 | 6 | 1.4 |
| AS/RND4 | 0 | 8 | 1.4 |
| AS/RND5 | 0 | 12 | 0.8 |
| AS/RND6 | 0 | 8 | 0.9 |
| siRNA3 | 0 | 10 | 0.6 |

#### Table 4: Primer sequences

| Primer name | Sequence (5’→3’) |
| --- | --- |
| 604 T7 NotI_R | CAGCGGCCGCAGATCTAAAAA |
| TS1 colPCR F | CGTGCATAAACAACACACACG |
| TS2 colPCR F | CTCGAGAGCTACGCAATCAA |
| psiC2-XhoI F | AGGACGCTCCAGATGAAATG |
| psiC2-NotI R | CAAACCCTAACCACCGCTTA |
| CCND1_F | TCCTCTCCAAAATGCCAGAG |
| CCND1_R | GGCGGATTGGAAATGAACT |
| GAPDH_F | GAAGGTGAAGGTCGGAGTCA |
| GAPDH_R | AATGAAGGGGTCATTGATGG |
| ACTB_F | TCACCCACACTGTGCCCATCTACGA |
| ACTB_R | CAGCGGAACCGCTCATTGCCAATGG |
| SMAD2_F | GGAATTTGCTGCTCTTCTGG |
| SMAD2_R | TCTGCCTTCGGTATTCTGCT |
| CDKN1A_F | GGAGACTCTCAGGGTCGAAA |
| CDKN1A_R | CTTCCTGTGGGCGGATTAG |
| RB1_F | TTCACCCCTGAAGAGTCCAT |
| RB1_R | AGTCCCGAATGATTCACCAA |
| SP1_F | TATAGCAAATGCCCCAGGTG |
| SP1_R | GGGCTGTTTTCTCCTTCCTC |
| PTEN_F | TTGAAGGCGTATACAGGAACAA |
| PTEN_R | GCAATTAAATTTGGCGGTGT |
| IFIT1_F | AGAACGGCTGCCTAATTTACAG |
| IFIT1_R | GCTCCAGACTATCCTTGACCTG |
| PKR_F | TTCTCTGGGCTTTTCTTCCA |
| PKR_R | ATGATGGAAAGCGAACAAGG |

#### Table 5: Differentially expressed genes (adjusted p value < 0.05) between siCON and mock transfections. Column order: Base mean abundance, log2 fold change (lfc) siCON vs. mock, lfc standard error of means, adjusted P values, Gene ID, Gene Symbol and fold change (siCON vs. mock).

| BaseMean | log2 FoldChange | Lfc SE | P Adjusted | GeneID | Gene Symbol | Fold change |
| --- | --- | --- | --- | --- | --- | --- |
| 1267.36 | -1.26 | 0.21 | 6.40E-06 | ENSG00000149591 | TAGLN | 0.42 |
| 54776.75 | -1.06 | 0.22 | 3.10E-03 | ENSG00000171858 | RPS21 | 0.48 |
| 252.28 | -1.07 | 0.23 | 3.10E-03 | ENSG00000211450 | C11orf31 | 0.48 |
| 983.07 | -1.10 | 0.24 | 3.59E-03 | ENSG00000130313 | PGLS | 0.47 |
| 2213.22 | -1.04 | 0.23 | 5.90E-03 | ENSG00000139428 | MMAB | 0.49 |
| 3115.24 | -0.97 | 0.22 | 7.26E-03 | ENSG00000149932 | TMEM219 | 0.51 |
| 569.01 | -0.95 | 0.22 | 1.19E-02 | ENSG00000013288 | MAN2B2 | 0.52 |
| 3184.15 | -0.92 | 0.22 | 1.55E-02 | ENSG00000124155 | PIGT | 0.53 |
| 855.30 | -0.90 | 0.22 | 1.71E-02 | ENSG00000168802 | CHTF8 | 0.53 |
| 2571.94 | -0.88 | 0.22 | 1.80E-02 | ENSG00000126749 | NA | 0.54 |
| 395.27 | -0.90 | 0.22 | 2.12E-02 | ENSG00000159231 | CBR3 | 0.54 |
| 1063.12 | -0.80 | 0.20 | 2.61E-02 | ENSG00000188486 | H2AFX | 0.57 |
| 3046.54 | -0.82 | 0.21 | 3.92E-02 | ENSG00000168393 | DTYMK | 0.57 |
| 2826.60 | -0.75 | 0.20 | 4.31E-02 | ENSG00000140416 | TPM1 | 0.59 |
| 699.29 | -0.79 | 0.21 | 4.98E-02 | ENSG00000137038 | TMEM261 | 0.58 |

#### Table 6: Differentially expressed genes (adjusted p value < 0.05) between siRND2 and mock transfections. Column order: Base mean abundance, log2 fold change (lfc) siRND2 vs. mock, lfc standard error of means, adjusted P values, Gene ID, Gene Symbol and fold change (siRND2 vs. mock).

| BaseMean | log2 Fold Change | FfcSE | P Adjusted | GeneID | Gene Symbol | Fold change |
| --- | --- | --- | --- | --- | --- | --- |
| 278.93 | 0.89 | 0.20 | 2.80E-02 | ENSG00000198918 | RPL39 | 1.86 |
| 540.60 | 0.80 | 0.19 | 4.14E-02 | ENSG00000170584 | NUDCD2 | 1.74 |
